# Supplementary material for: Application of chiral cationic iridium( iii ) complexes for triplet–triplet annihilation up-conversion of photon energy in R -limonene
Source: Royal Society of Chemistry journal article supplement (doi:10.1039/d5cp03773e), 2026-01-01
Supplement: d5cp03773e1.pdf [file d5cp03773e1.pdf]

## Supplementary Information

### **Application of chiral cationic iridium(III) complexes for triplet-triplet annihilation up-conversion of photon energy in *R*-limonene**

**Akihiko Yamagishi,<sup>a</sup> Jun Yoshida<sup>b</sup> and Hisako Sato\*<sup>c</sup>**

<sup>a</sup> Faculty of Medicine, Toho University, Ota-ku 143-8540, Japan

<sup>b</sup> Department of Chemistry, College of Humanities & Sciences, Nihon University, Tokyo 156-8550, Japan

<sup>c</sup> Faculty of Science, Ehime University, Matsuyama, Ehime 790-8577, Japan

### **Contents**

- 1. Chromatographic resolution and electronic circular dichroism spectra of [Ir(piq)<sub>2</sub>(C<sub>19</sub>bpy)]PF<sub>6</sub>**
- 2. Electronic circular dichroism spectra of enantiomeric [Ir(piq)<sub>2</sub>(dmbpy)]PF<sub>6</sub> and [Ir(piq)<sub>2</sub>(C<sub>9</sub>bpy)]PF<sub>6</sub>**
- 3. Solubility of racemic and enantiomeric [Ir(piq)<sub>2</sub>(dmbpy)]PF<sub>6</sub> in *R*-limonene**
- 4. Emission spectra when a laser light was irradiated onto an *R*-limonene solution containing Ir(III) complex and DPA**
- 5. S-V plots of *R*-limonene solutions containing DPA and [Ir(piq)<sub>2</sub>(C<sub>n</sub>bpy)]<sup>+</sup> (n = 9 or 19)**
- 6. UV-vis spectra of [Ir(piq)<sub>2</sub>(dmbpy)]PF<sub>6</sub>, [Ir(piq)<sub>2</sub>(C<sub>n</sub>bpy)]PF<sub>6</sub> (n=9, 19) and DPA in *R*-limonene**
- 7. Lifetimes of [Ir(piq)<sub>2</sub>(dmbpy)]PF<sub>6</sub> and [Ir(piq)<sub>2</sub>(C<sub>n</sub>bpy)]PF<sub>6</sub> (n=9, 19) in *R*-limonene**
- 8. Standard emission spectra of [Ru(dmbpy)<sub>3</sub>] and DPA in CH<sub>2</sub>Cl<sub>2</sub>**
- 9. Laser intensity dependence of up-conversion efficiency for an *R*-limonene solution containing Λ-[Ir(piq)<sub>2</sub>(dmbpy)] and DPA**

# 1. Chromatographic resolution and electronic circular dichroism spectra of $[\text{Ir}(\text{piq})_2(\text{C}_{19}\text{bpy})]\text{PF}_6$

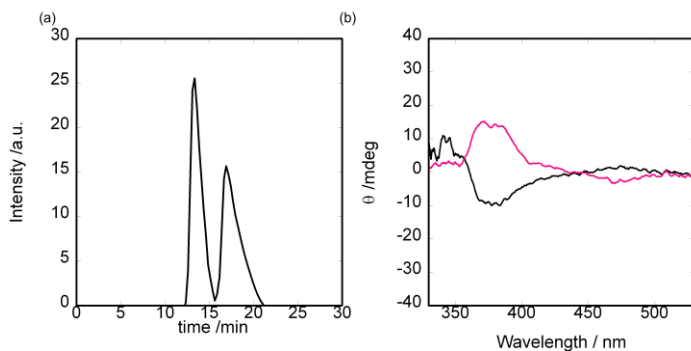

**Figure S1.** (a) Chromatogram when racemic  $[\text{Ir}(\text{piq})_2(\text{C}_{19}\text{bpy})]\text{PF}_6$  was eluted on a HPLC column (CHIRALPACK IA (Daicel, Japan)). Elution conditions were following; flow rate ( $1.0 \text{ mLmin}^{-1}$ ), wavelength (340 nm), eluent (acetonitrile containing 0.1 (v/v) % of diethylamine and 0.1 (v/v) % of trifluoroacetic acid, and temperature ( $27^\circ\text{C}$ ). The first and second peaks were  $\Delta$ - and  $\Lambda$ -enantiomers, respectively.

(b) The electronic circular dichroism spectra of the resolved enantiomers of  $[\text{Ir}(\text{piq})_2(\text{C}_{19}\text{bpy})]\text{PF}_6$  in a mixture of *R*-limonene and acetonitrile (black and red curves for  $\Delta$ - and  $\Lambda$ -enantiomers, respectively). Samples were prepared by mixing the samples used for TTA-UC experiments (0.5 mL) with acetonitrile (2.0 mL).

2. Electronic circular dichroism spectra of enantiomeric  $[\text{Ir}(\text{piq})_2(\text{dmbpy})]\text{PF}_6$  and  $[\text{Ir}(\text{piq})_2(\text{C}_9\text{bpy})]\text{PF}_6$

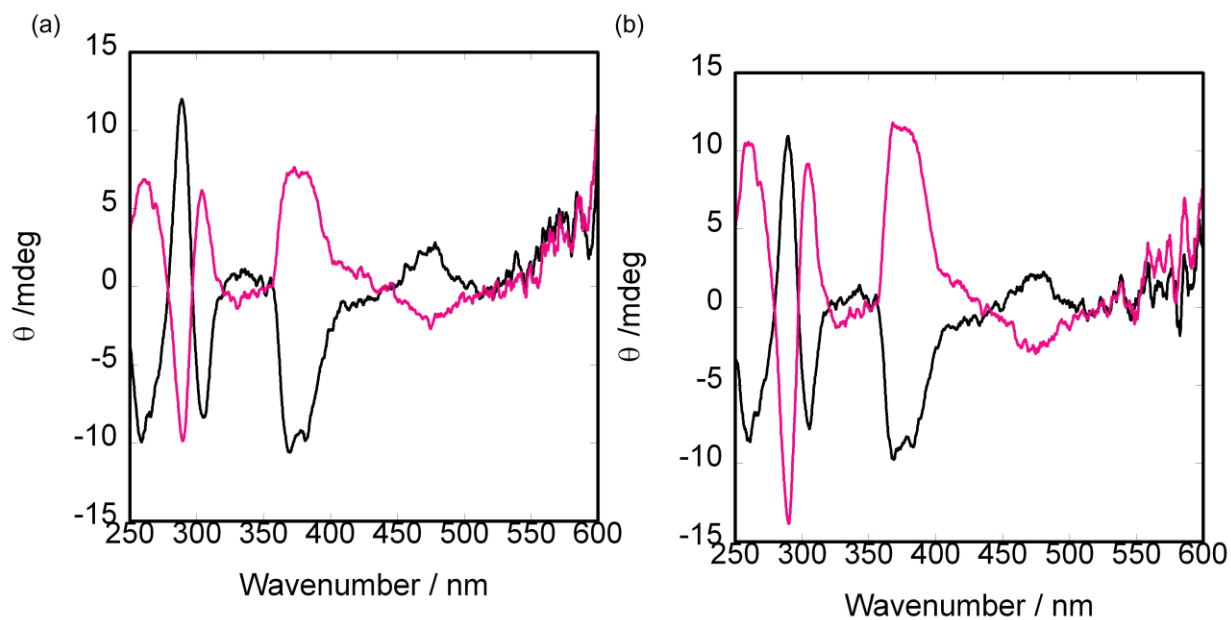

**Figure S2.** Electronic circular dichroism spectra of (a)  $[\text{Ir}(\text{piq})_2(\text{dmbpy})]\text{PF}_6$  (in methanol) and (b)  $[\text{Ir}(\text{piq})_2(\text{C}_9\text{bpy})]\text{PF}_6$  (in methanol). The black and red curves are for  $\Delta$ - and  $\Lambda$ -enantiomers, respectively.

### 3. Solubility of racemic and enantiomeric $[\text{Ir}(\text{piq})_2(\text{dmbpy})]\text{PF}_6$ in *R*-limonene

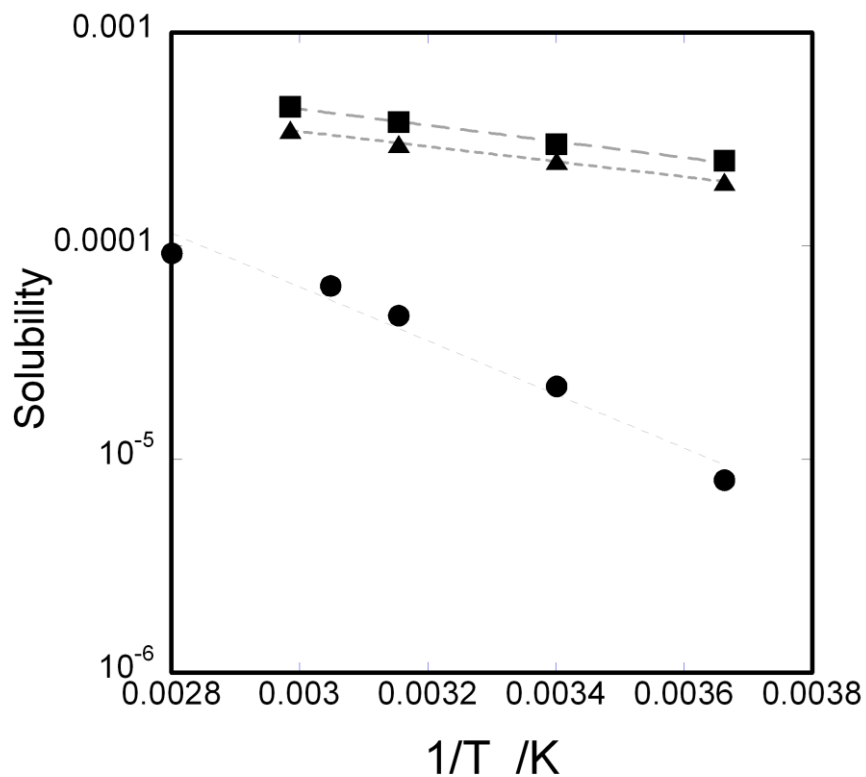

**Figure S3.** Temperature dependence of solubility of racemic (filled circle),  $\Delta$ - (filled triangle) and  $\Lambda$ -  $[\text{Ir}(\text{piq})_2(\text{dmbpy})]\text{PF}_6$  in *R*-limonene. From the slope of each plot, the enthalpy of solubilization ( $-\Delta H$ ) was calculated to be 24.1, 6.8 and 7.2  $\text{kJmol}^{-1}$ , respectively, according to the equation of (slope) =  $\Delta H/R$  ( $R$  = gas constant).

4. Emission spectra when a laser light was irradiated onto an *R*-limonene solution containing Ir(III) complex and DPA

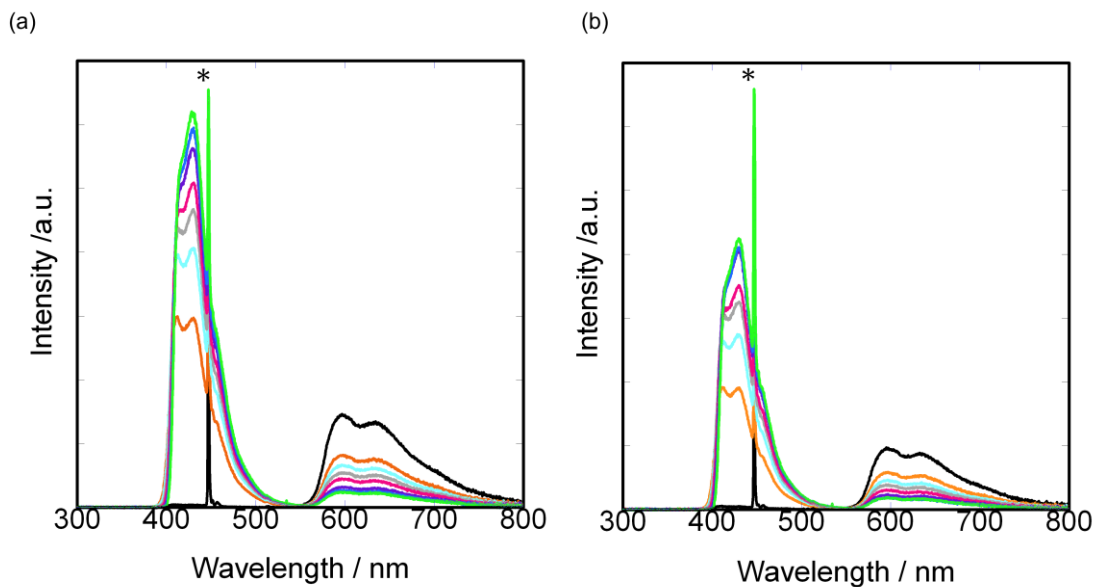

**Figure S4.** A laser light was irradiated onto a *R*-limonene solution containing DPA and (a)  $\Delta$ - or (b)  $\Lambda$ -[Ir(piq)<sub>2</sub>(dmbpy)]<sup>+</sup> under air, respectively. The concentration of DPA was 0 mM (black), 0.32 mM (orange), 0.63 mM (sky-blue), 0.92 mM (grey), 1.2 mM (red), 1.7 mM (violet), 2.2 mM (blue) and 2.6 mM (green), respectively. The concentration of Ir(III) complex was  $2.4 \times 10^{-5}$  M or  $1.8 \times 10^{-5}$  M for  $\Delta$ - or  $\Lambda$ -[Ir(piq)<sub>2</sub>(dmbpy)]<sup>+</sup>, respectively. A scattered fraction of a laser light is indicated by \*(asterisk).

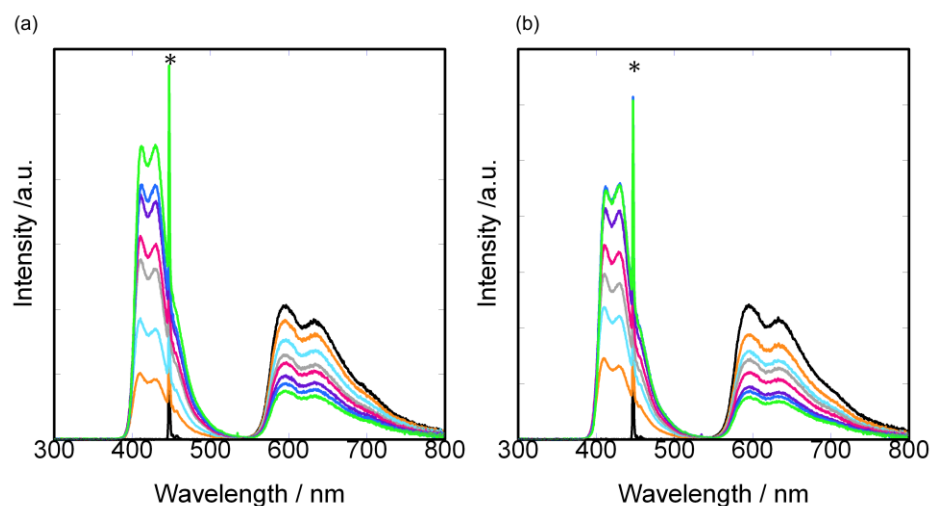

**Figure S5.** A laser light was irradiated onto a *R*-limonene solution containing DPA and (a)  $\Delta$ - or (b)  $\Lambda$ -[Ir(piq)<sub>2</sub>(C<sub>9</sub>bpy)]<sup>+</sup> under air, respectively. The concentration of DPA was 0 mM (black), 0.08 mM (orange), 0.16 mM (sky-blue), 0.23 mM (grey), 0.30 mM (red), 0.43 mM (violet), 0.55 mM (blue) and 0.66 mM (green), respectively. The concentration of Ir(III) complex was  $2.7 \times 10^{-5}$  M or  $2.9 \times 10^{-5}$  M for  $\Delta$ - or  $\Lambda$ -[Ir(piq)<sub>2</sub>(C<sub>9</sub>bpy)]<sup>+</sup>, respectively. A scattered fraction of a laser light is indicated by \*(asterisk).

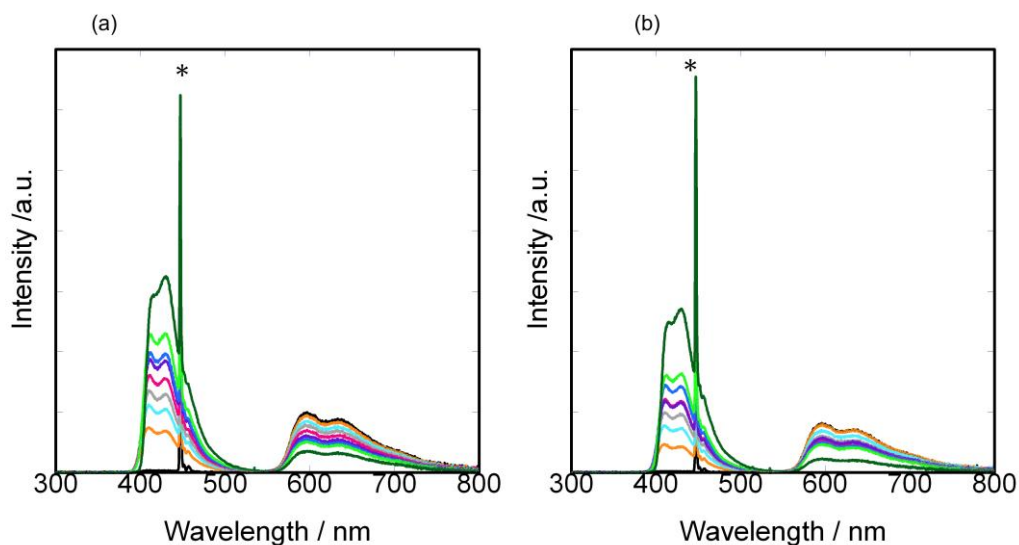

**Figure S6.** A laser light was irradiated onto a *R*-limonene solution containing DPA and (a)  $\Delta$ - or (b)  $\Lambda$ -[Ir(piq)<sub>2</sub>(C<sub>19</sub>bpy)]<sup>+</sup> under air, respectively. The concentration of DPA was 0 mM (black), 0.08 mM (orange), 0.15 mM (sky-blue), 0.22 mM (grey), 0.29 mM (red), 0.41mM (violet), 0.52 mM (blue), 0.63mM (light green) and 1.26 mM(moss green), respectively. The concentration of Ir(III) complex was  $1.5 \times 10^{-5}$  M or  $1.3 \times 10^{-5}$  M for  $\Delta$ - or  $\Lambda$ -[Ir(piq)<sub>2</sub>(C<sub>19</sub>bpy)]<sup>+</sup>, respectively. . A scattered fraction of a laser light is indicated by \*(asterisk).

## 5. S-V plots of *R*-limonene solutions containing DPA and $[\text{Ir}(\text{piq})_2(\text{C}_n\text{bpy})]^+ (n=9 \text{ or } 19)$

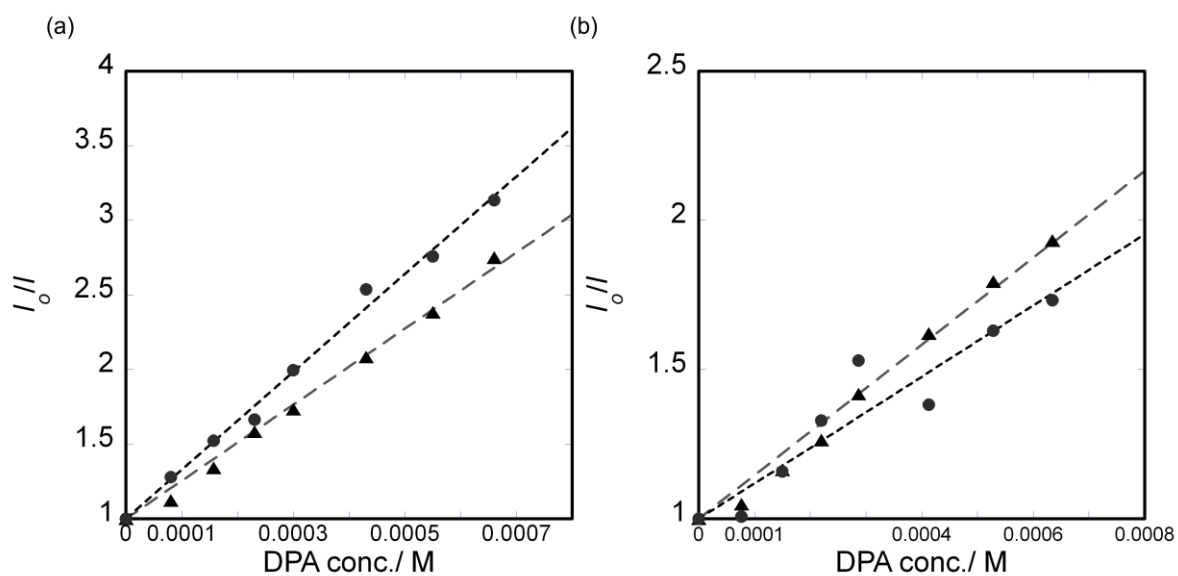

**Figure S7.** S-V plots of  $\Delta$ -or  $\Lambda$ - $[\text{Ir}(\text{piq})_2(\text{C}_9\text{bpy})]^+$  (a) and  $\Delta$ -or  $\Lambda$ - $[\text{Ir}(\text{piq})_2(\text{C}_{19}\text{bpy})]^+$  (b) as an emitter and DPA as a quencher. Plots of solid triangles and solid circles are for  $\Delta$ - and  $\Lambda$ -enantiomers, respectively. Experimental conditions are described in the text.



**6. UV-vis spectra of  $[\text{Ir}(\text{piq})_2(\text{dmbpy})]\text{PF}_6$ ,  $[\text{Ir}(\text{piq})_2(\text{C}_n\text{bpy})]\text{PF}_6$  ( $n=9, 19$ ) and DPA alone in *R*-limonene**

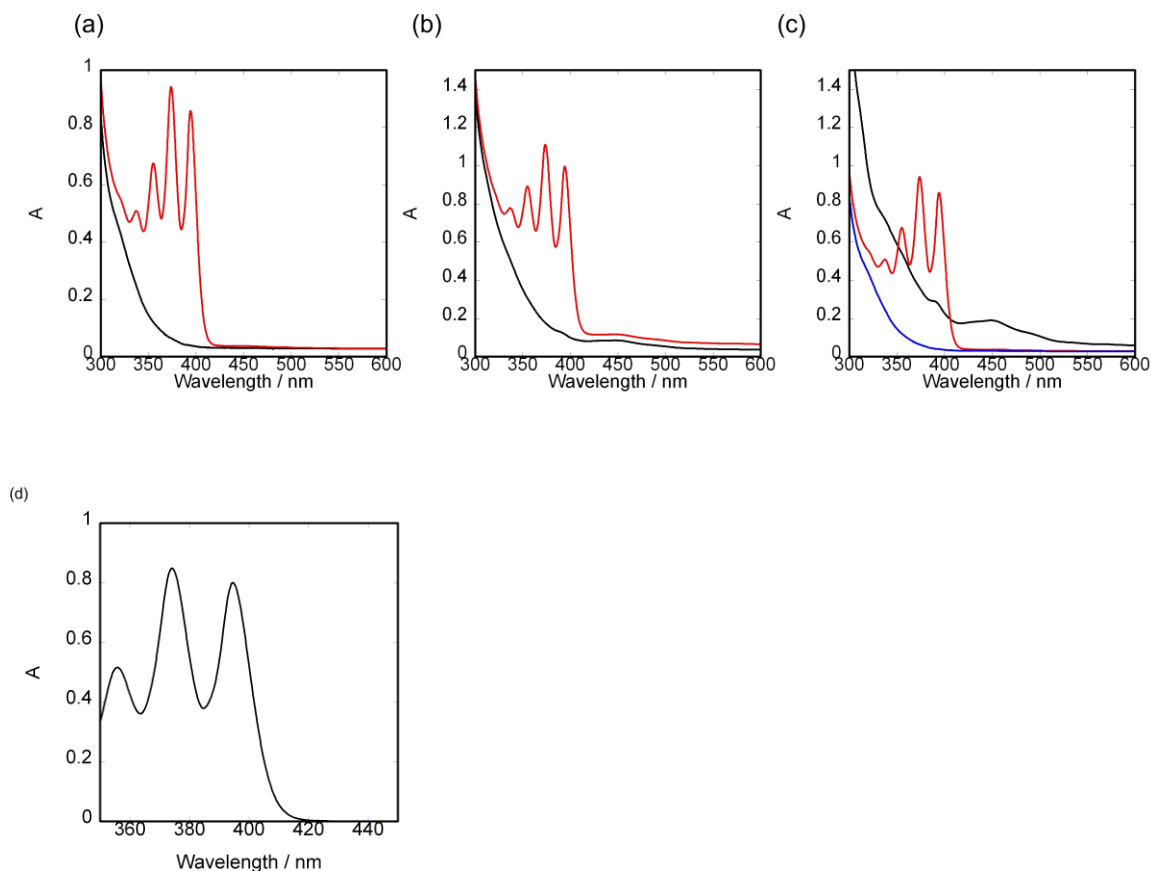

**Figure S8.** UV-vis spectra of (a)  $\Delta\text{-}[\text{Ir}(\text{piq})_2(\text{dmbpy})]^+$  ( $4.0 \times 10^{-6}$  M) and DPA ( $8.0 \times 10^{-6}$  M), (b)  $\Delta\text{-}[\text{Ir}(\text{piq})_2(\text{C}_9\text{bpy})]$  ( $6.9 \times 10^{-5}$  M) and DPA ( $6.9 \times 10^{-5}$  M), (c)  $\Delta\text{-}[\text{Ir}(\text{piq})_2(\text{C}_{19}\text{bpy})]^+$  ( $4.0 \times 10^{-6}$  M) and DPA ( $6.9 \times 10^{-5}$  M) and (d) DPA ( $6.9 \times 10^{-5}$  M). A medium was *R*-limonene (blue line in (c)). The spectra were measured using a quartz cell of 2 mm optical path.

The black and red lines are for Ir(III) complex only and for a pair of Ir(III) complex/DPA, respectively.

## 7. Lifetimes of [Ir(piq)<sub>2</sub>(dmbpy)]PF<sub>6</sub> and [Ir(piq)<sub>2</sub>(C<sub>n</sub>bpy)]PF<sub>6</sub> (n=9, 19) in *R*-limonene

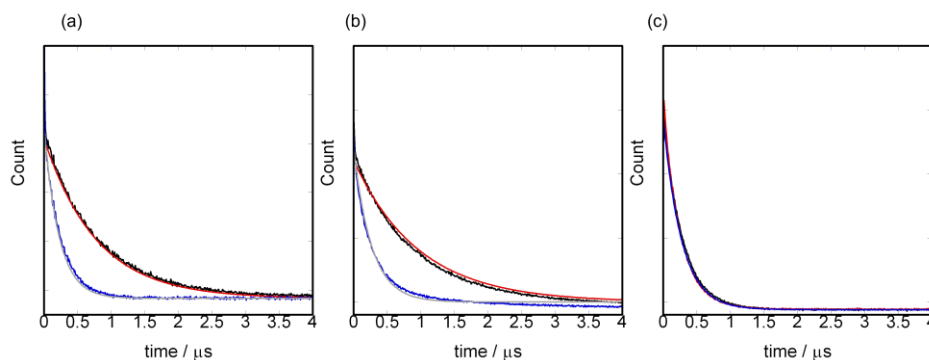

**Figure S9.** Decay curves of (a)  $\Delta$ -[Ir(piq)<sub>2</sub>(dmbpy)]PF<sub>6</sub>, (b)  $\Delta$ -[Ir(piq)<sub>2</sub>(C<sub>9</sub>bpy)] PF<sub>6</sub> and (c)  $\Delta$ -[Ir(piq)<sub>2</sub>(C<sub>19</sub>bpy)] PF<sub>6</sub> in *R*-limonene. Emission was measured at 600 nm, when the sample solutions were irradiated with a laser pulse at 355 nm. Blue and grey lines are the observed and fitting curves under air, respectively. Black and red lines are the observed and fitting curves under nitrogen atmosphere, respectively. Fitting was performed under the assumption of a single exponential decay. The results are summarized in Table S1.

Table S1. Emission lifetimes in *R*-limonene

| Ir(III) complex                                                     | Lifetime under air (μs) | Lifetime under N <sub>2</sub> (μs) |
|---------------------------------------------------------------------|-------------------------|------------------------------------|
| $\Delta$ -[Ir(piq) <sub>2</sub> (dmbpy)] <sup>+</sup>               | 0.22                    | 0.78                               |
| $\Delta$ -[Ir(piq) <sub>2</sub> (C <sub>9</sub> bpy)]               | 0.27                    | 0.97                               |
| $\Delta$ -[Ir(piq) <sub>2</sub> (C <sub>19</sub> bpy)] <sup>+</sup> | 0.28                    | 0.28                               |

## 8. Emission spectrum of a CH<sub>2</sub>Cl<sub>2</sub> solution of [Ru(dmbpy)<sub>3</sub>]Cl<sub>2</sub> and DPA as a standard

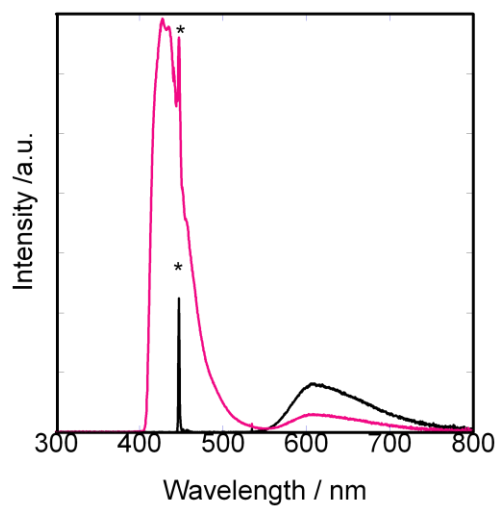

**Figure S10.** A laser light was irradiated onto a CH<sub>2</sub>Cl<sub>2</sub> solution containing [Ru(dmbpy)<sub>3</sub>]Cl<sub>2</sub> alone (black) or [Ru(dmbpy)<sub>3</sub>]Cl<sub>2</sub> and DPA (red), respectively. The measurements were performed under air. The concentrations of [Ru(dmbpy)<sub>3</sub>]Cl<sub>2</sub> and DPA was 0.28 mM and 6.4 mM, respectively. A scattered fraction of a laser light is indicated by \*(asterisk).

**9. Laser intensity dependence of up-conversion efficiency for an *R*-limonene solution containing  $\Lambda$ -[Ir(piq)<sub>2</sub>(dmbpy)] and DPA**

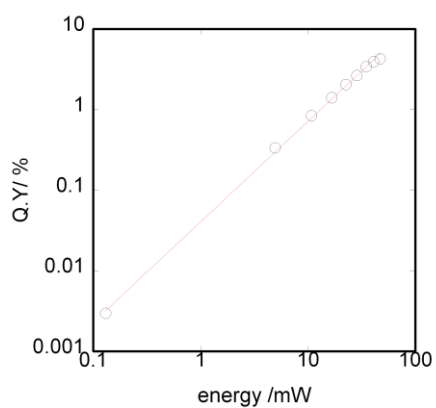

**Figure S11.** The dependence of TTA-UC quantum yield on the laser light power. The sample was a *R*-limonene containing  $\Lambda$ -[Ir(piq)<sub>2</sub>(dmbpy)] ( $1.8 \times 10^{-5}$  M) and DPA (2.6 mM).
